# Supplementary material
Source: publisher figshare collection journal article supplement (https://sage.figshare.com/ndownloader/files/20179151)
Supplement: Supplementary file [file 20179151]

## Breast cancer: surgical options

Use this **Option Grid™** decision aid to help you and your healthcare professional talk about how to best treat your breast cancer. This decision aid is for women with early stage breast cancer (stages I to IIIA).

| Frequently asked questions                                       | Lumpectomy with radiation                                                                                                                                  | Mastectomy                                                                                                                                                 |
|------------------------------------------------------------------|------------------------------------------------------------------------------------------------------------------------------------------------------------|------------------------------------------------------------------------------------------------------------------------------------------------------------|
| <b>What is removed?</b>                                          | The cancer lump is removed, with some surrounding tissue.                                                                                                  | The whole breast is removed.                                                                                                                               |
| <b>Which surgery is best for long-term survival?</b>             | Long-term survival rates are the same for both surgeries.                                                                                                  | Long-term survival rates are the same for both surgeries.                                                                                                  |
| <b>What are the chances of cancer coming back in the breast?</b> | Breast cancer will come back in the breast in about 5 to 10 in 100 women (5-10%) in the 10 years after a lumpectomy.                                       | Breast cancer will come back in the area of the scar in about 5 to 10 in 100 women (5-10%) in the 10 years after a mastectomy.                             |
| <b>Will I need more than one surgery?</b>                        | Possibly, 20 in 100 women (20%) may need another surgery to remove breast tissue or lymph node that have cancer.                                           | Possibly, if your lymph nodes have cancer.<br>Yes, if you choose breast reconstruction.                                                                    |
| <b>How long will it take to recover?</b>                         | Most women are home within 24 hours of surgery.                                                                                                            | Most women are home within 24 hours of surgery. It may take longer with reconstruction.                                                                    |
| <b>Will I need radiation after surgery?</b>                      | Yes, for up to seven weeks after surgery.                                                                                                                  | Radiation is not usually given after mastectomy.                                                                                                           |
| <b>Will my lymph nodes be removed?</b>                           | If cancer has spread to the lymph nodes under your arm, your doctor will discuss with you whether you need more treatment such as surgery or radiotherapy. | If cancer has spread to the lymph nodes under your arm, your doctor will discuss with you whether you need more treatment such as surgery or radiotherapy. |
| <b>Will I need chemotherapy?</b>                                 | You may be offered chemotherapy, but this does not depend on the surgery you choose.                                                                       | You may be offered chemotherapy, but this does not depend on the surgery you choose.                                                                       |
| <b>Will I lose my hair?</b>                                      | Hair loss is common after chemotherapy.                                                                                                                    | Hair loss is common after chemotherapy.                                                                                                                    |
